# Supplementary material
Source: PubMed Central journal article supplement (PMC10564447)
Supplement: NIHMS1930965-supplement-13.pdf [file NIHMS1930965-supplement-13.pdf]

880

881

**Supplemental Table 1.** Selected baseline characteristics of the CO and NC study populations.

| Characteristics        | CO Cohort  | NC Cohort  |
|------------------------|------------|------------|
|                        | 213 (%)    | 344 (%)    |
| <b>Sex</b>             |            |            |
| Female                 | 132 (62.0) | 216 (62.7) |
| Male                   | 81 (38.0)  | 127 (37.0) |
| Transgender            | 0 (0.0)    | 1 (0.3)    |
| <b>Age (years)</b>     |            |            |
| 6-17                   | 0 (0.0)    | 55 (16.1)  |
| 18-39                  | 25 (11.7)  | 53 (15.4)  |
| 40-59                  | 76 (35.7)  | 114 (33.1) |
| >60                    | 112 (52.6) | 119 (34.6) |
| Missing                | 0 (0.0)    | 3 (0.8)    |
| <b>Race/Ethnicity</b>  |            |            |
| Non-Hispanic White     | 159 (74.6) | 265 (77.5) |
| Non-Hispanic Non-White | 27 (12.7)  | 44 (12.9)  |
| Hispanic               | 27 (12.7)  | 33 (9.6)   |
| Missing                | 0 (0.0)    | 2 (0.6)    |

882

883

884

885

886

887

888

889  
890  
891  
892  
893  
894  
895  
896  
897  
898  
899  
900  
901  
902  
903  
904  
905  
906  
907  
908  
909  
910  
911  
912  
913  
914  
915  
916

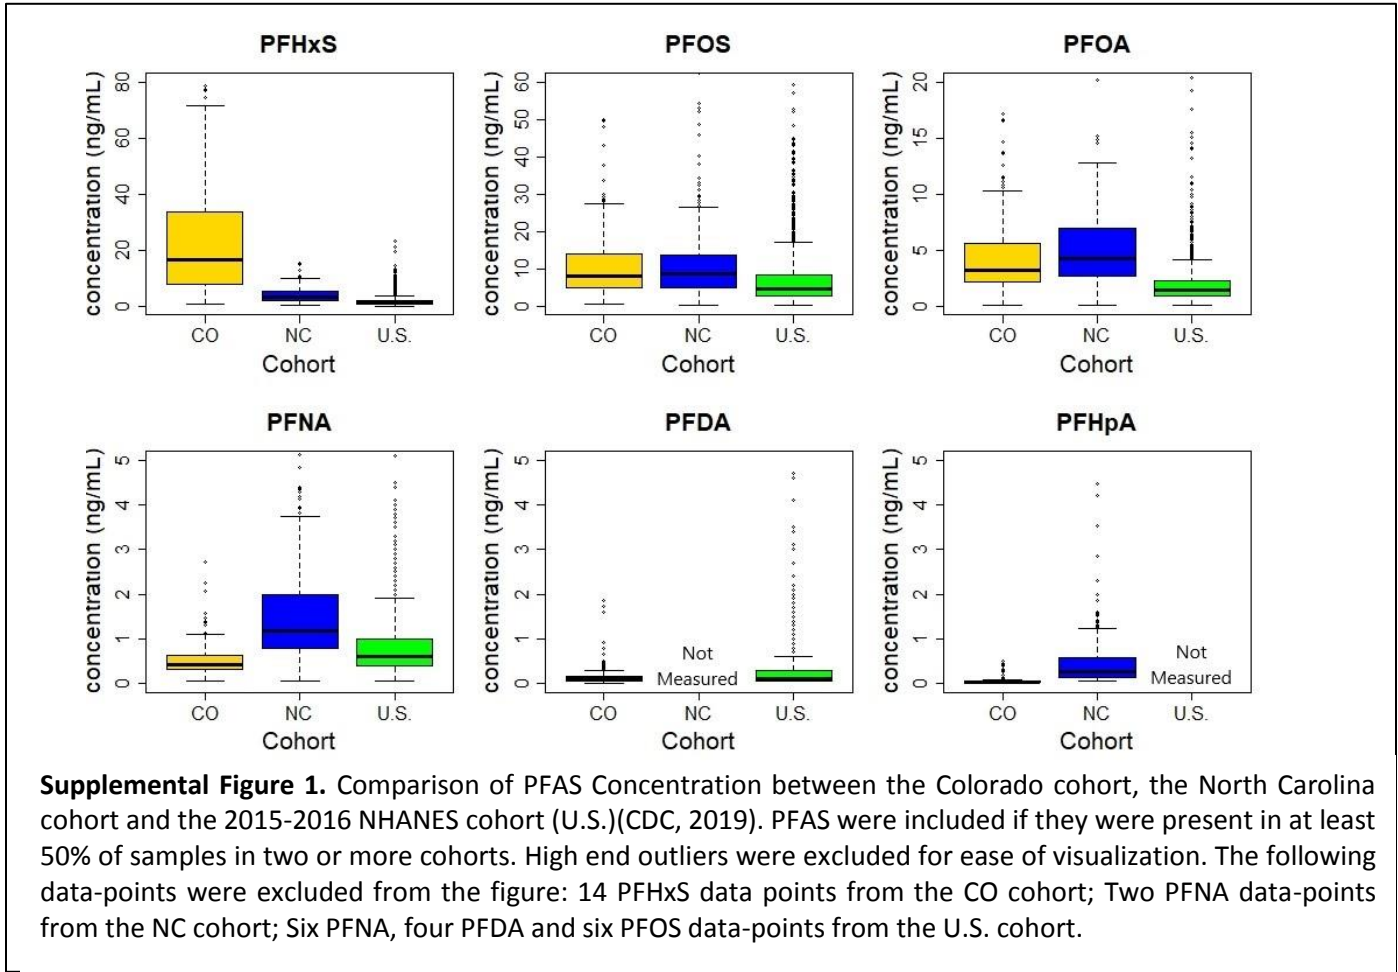

**Supplemental Figure 1.** Comparison of PFAS Concentration between the Colorado cohort, the North Carolina cohort and the 2015-2016 NHANES cohort (U.S.)(CDC, 2019). PFAS were included if they were present in at least 50% of samples in two or more cohorts. High end outliers were excluded for ease of visualization. The following data-points were excluded from the figure: 14 PFHxS data points from the CO cohort; Two PFNA data-points from the NC cohort; Six PFNA, four PFDA and six PFOS data-points from the U.S. cohort.

917  
918  
919  
920  
921  
922  
923  
924  
925  
926  
927  
928  
929  
930  
931  
932  
933  
934  
935  
936  
937  
938  
939  
940  
941  
942  
943  
944

Supplemental Figure 2.

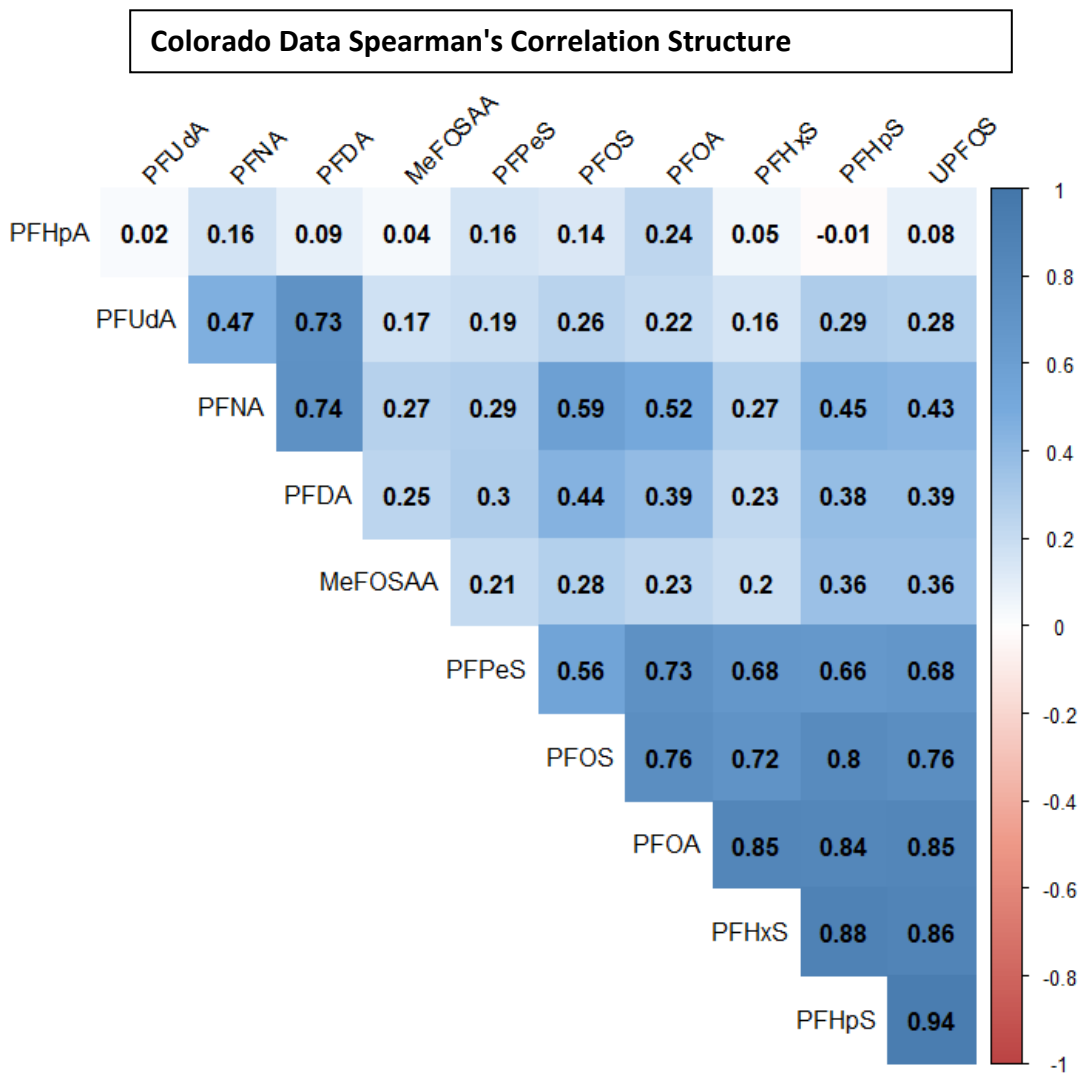

945

946

947

948

949

950

951 **Supplemental Figure 3.**

952

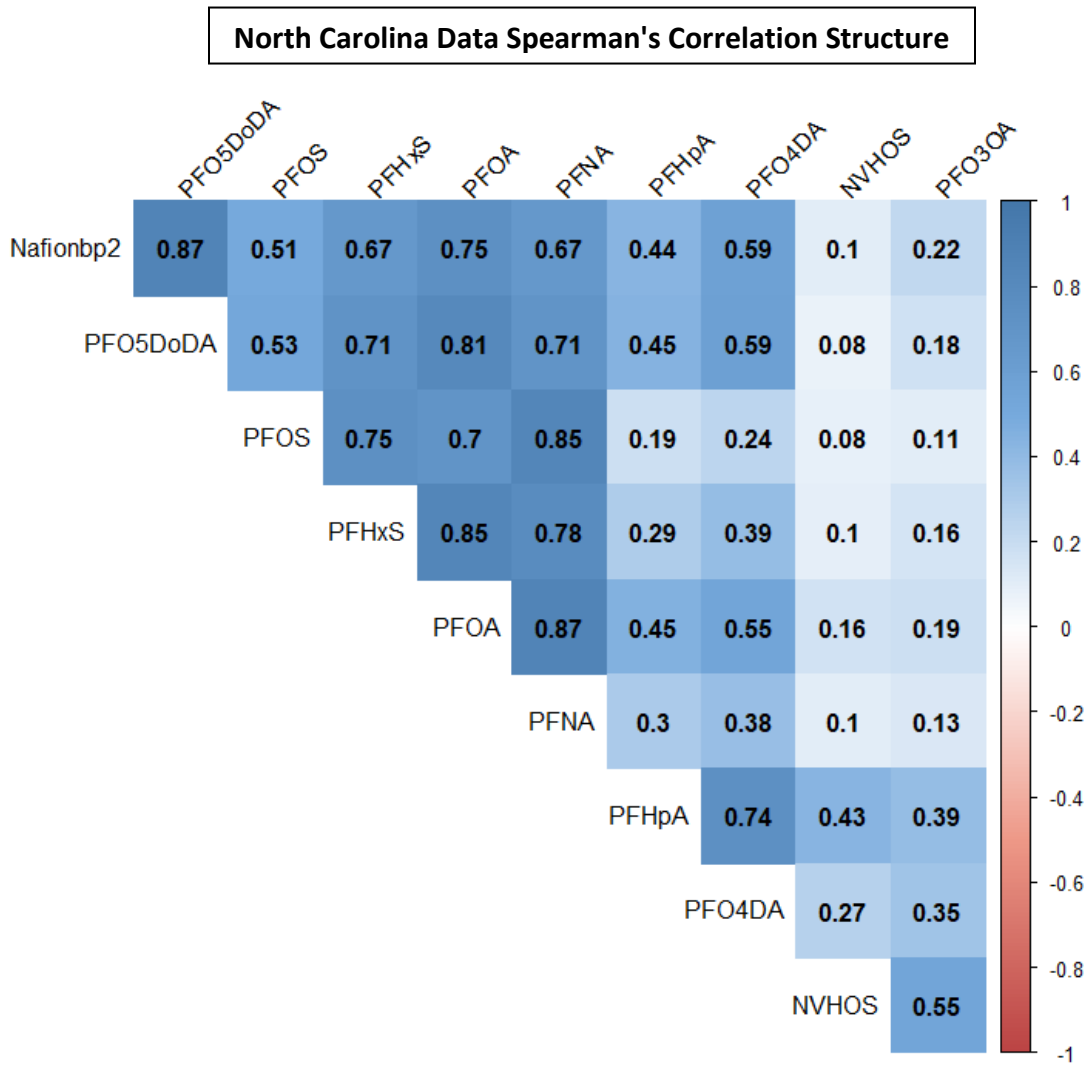

954

955

956

957

958

959

960

961 **Supplemental Figure 4.**

962

963

964

**NHANES Data Spearman's Correlation Structure**

965

966

967

968

969

970

971

972

973

974

975

976

977

978

979

980

981

982

983

Supplemental Data 1:

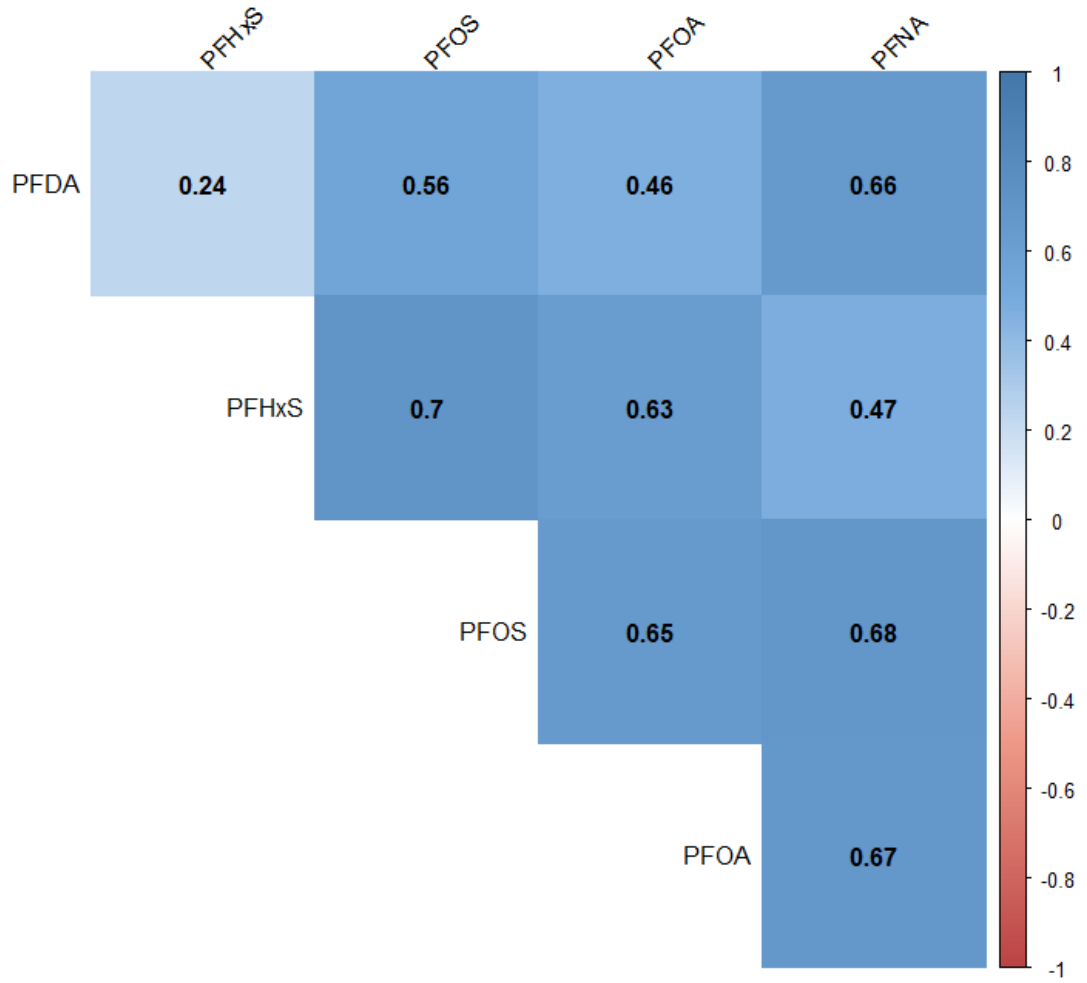

984 \*Uploaded with submission
